# Supplementary figures and images for: Multifunctionality of lanthanum–strontium manganite nanopowder
Source: Royal Society of Chemistry journal article supplement (doi:10.1039/d0cp01426e), 2020-01-01

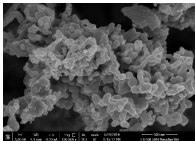

Supplement: d0cp01426e10.pdf [file d0cp01426e10.pdf]

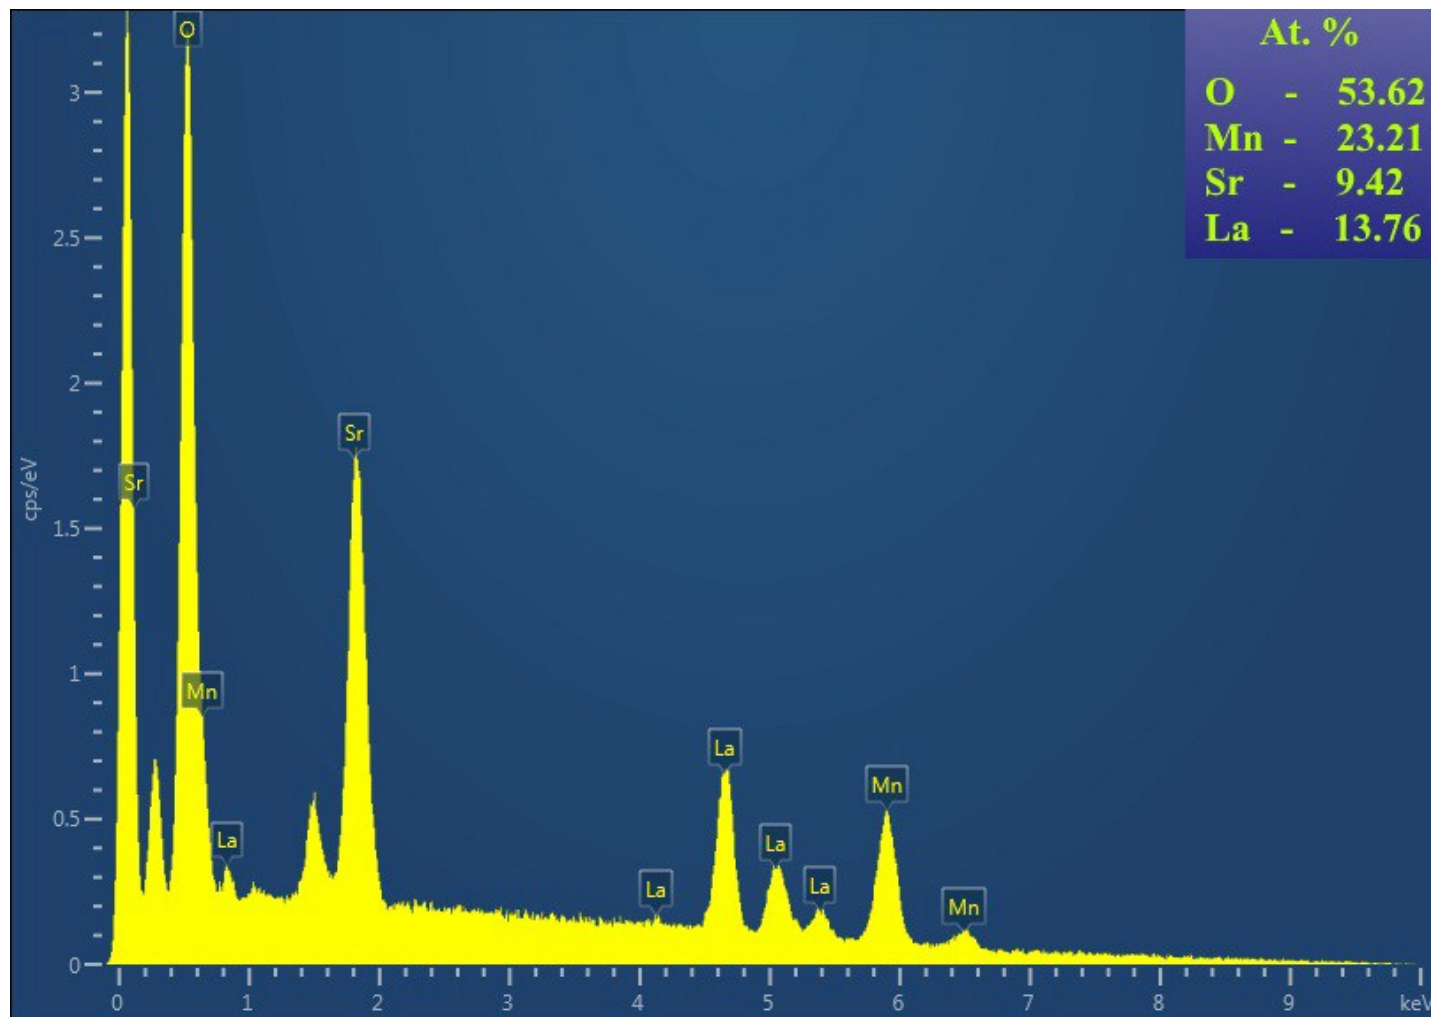

Supplement: d0cp01426e11.pdf [file d0cp01426e11.pdf]

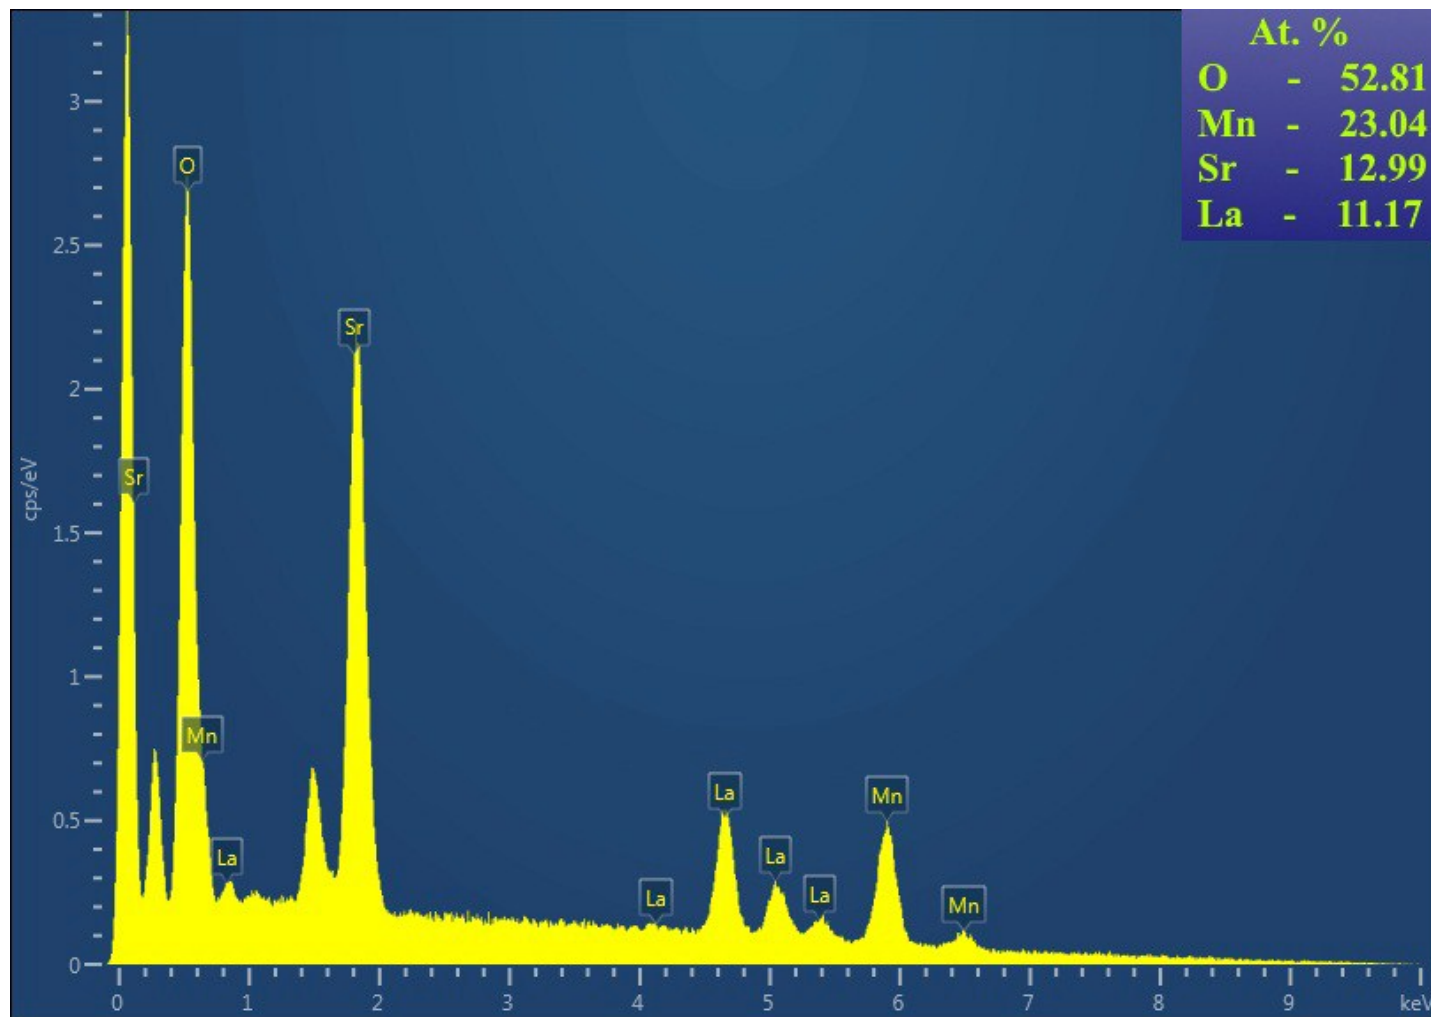

Supplement: d0cp01426e12.pdf [file d0cp01426e12.pdf]

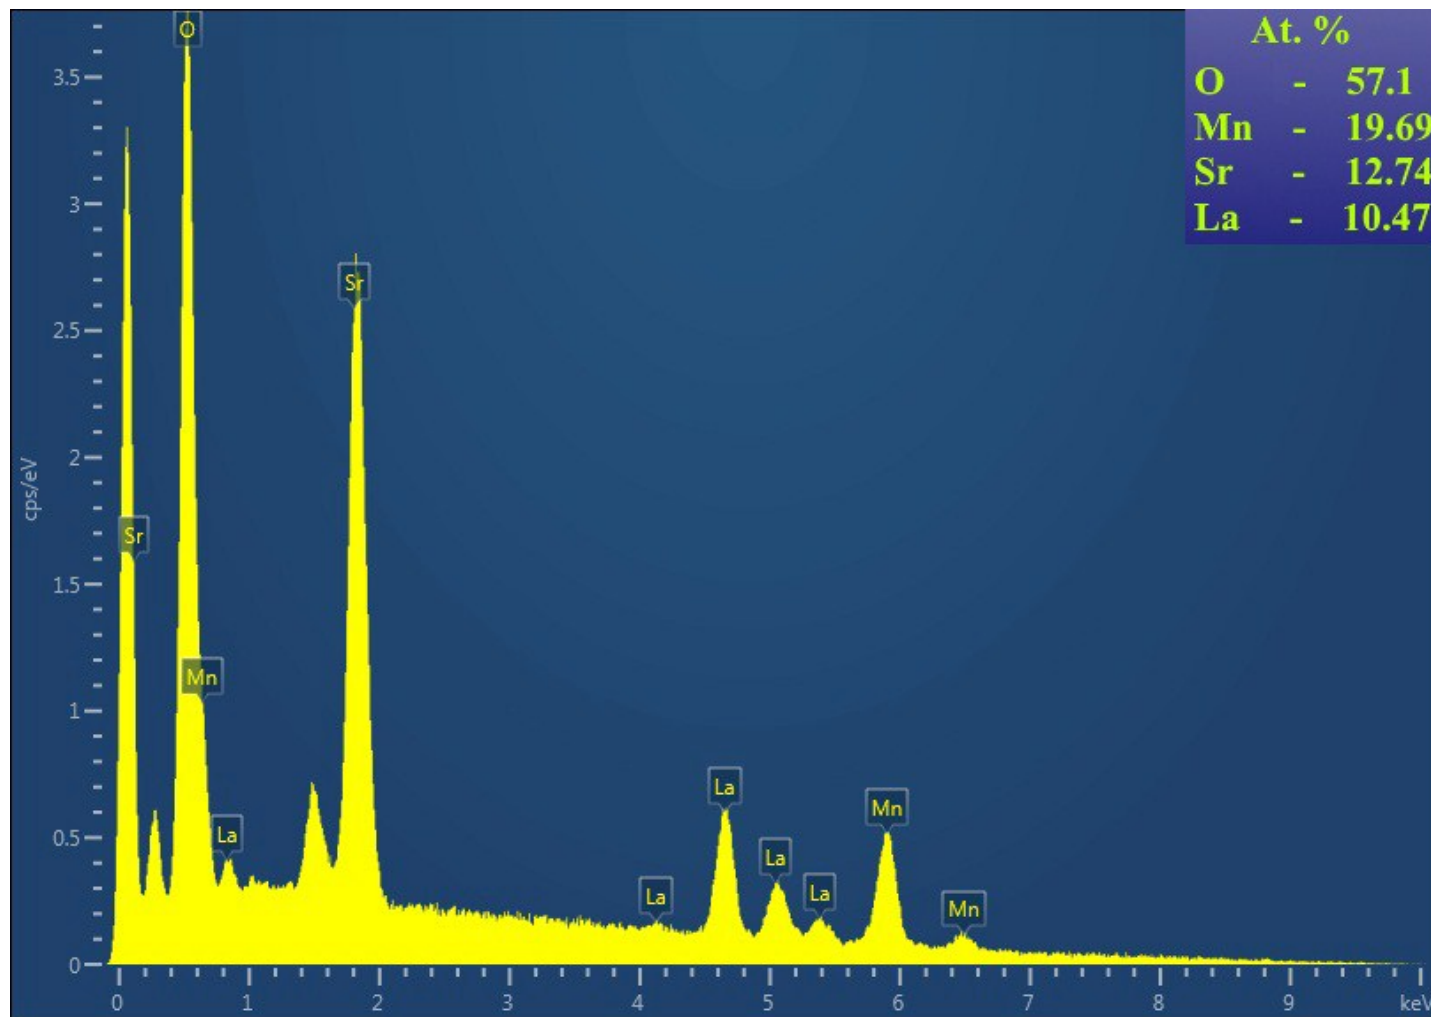

Supplement: d0cp01426e13.pdf [file d0cp01426e13.pdf]

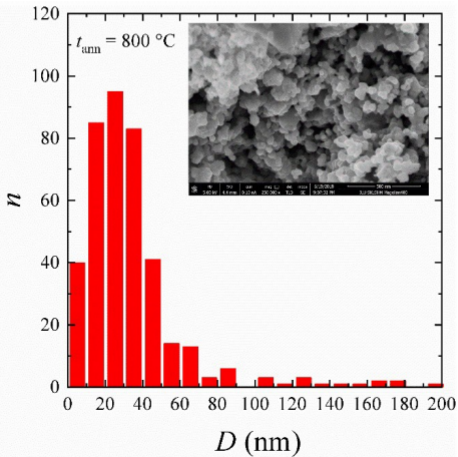

Supplement: d0cp01426e14.pdf [file d0cp01426e14.pdf]

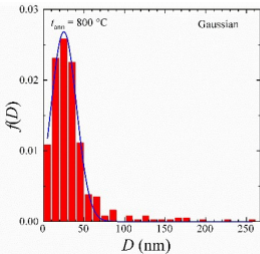

Supplement: d0cp01426e16.pdf [file d0cp01426e16.pdf]

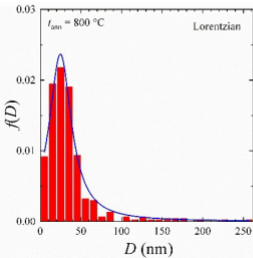

Supplement: d0cp01426e17.pdf [file d0cp01426e17.pdf]

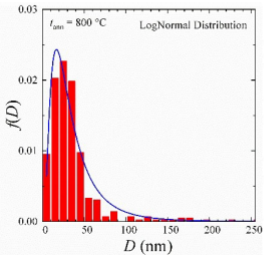

Supplement: d0cp01426e18.pdf [file d0cp01426e18.pdf]

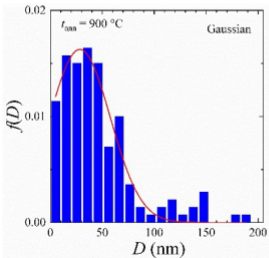

Supplement: d0cp01426e19.pdf [file d0cp01426e19.pdf]

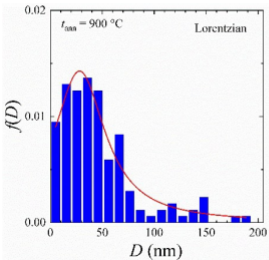

Supplement: d0cp01426e20.pdf [file d0cp01426e20.pdf]

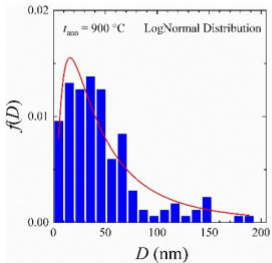

Supplement: d0cp01426e21.pdf [file d0cp01426e21.pdf]

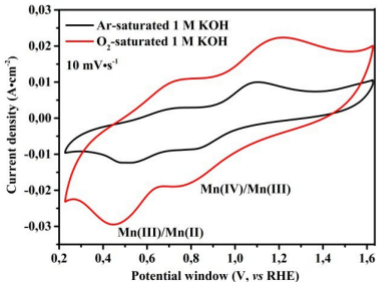

Supplement: d0cp01426e24.pdf [file d0cp01426e24.pdf]

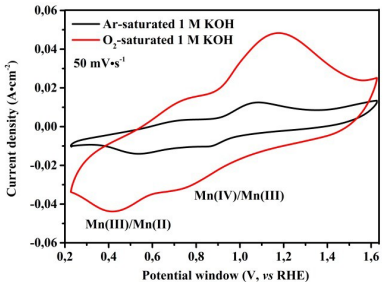

Supplement: d0cp01426e25.pdf [file d0cp01426e25.pdf]

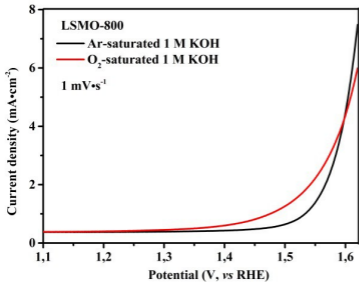

Supplement: d0cp01426e26.pdf [file d0cp01426e26.pdf]

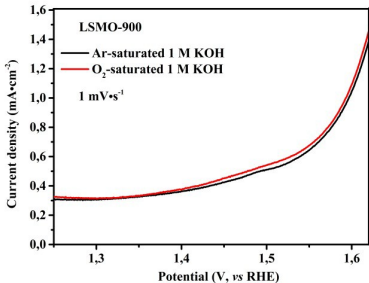

Supplement: d0cp01426e27.pdf [file d0cp01426e27.pdf]

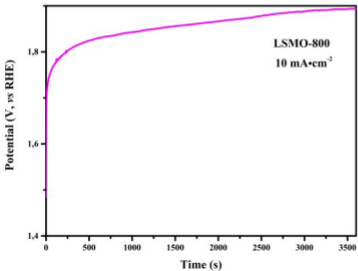

Supplement: d0cp01426e28.pdf [file d0cp01426e28.pdf]

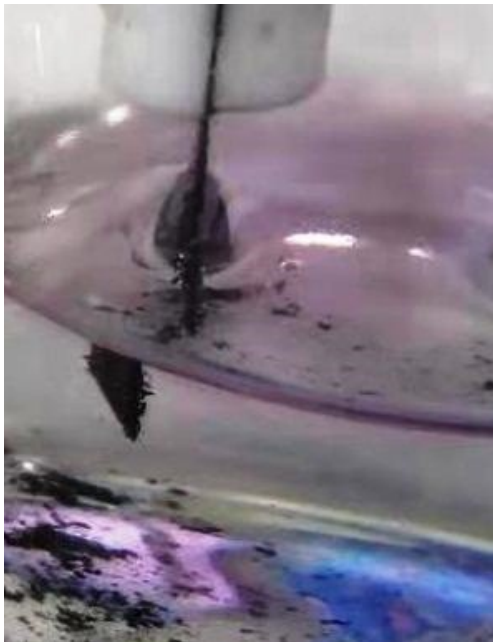

Supplement: d0cp01426e29.pdf [file d0cp01426e29.pdf]

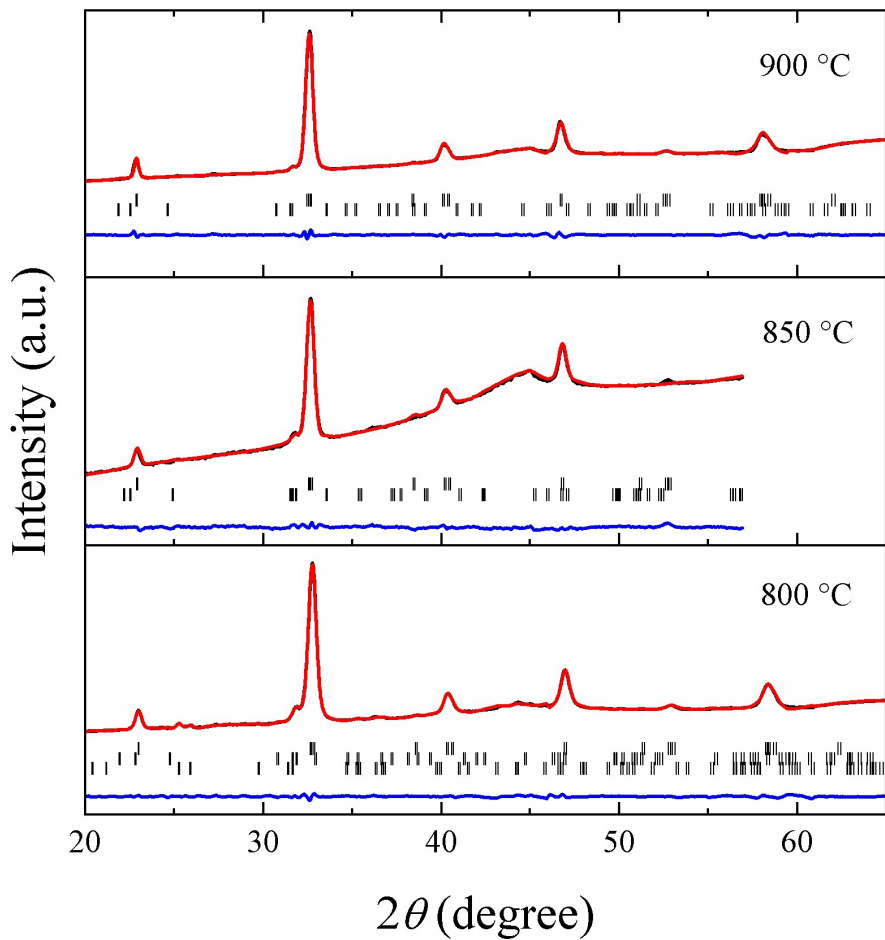

Supplement: d0cp01426e3.pdf [file d0cp01426e3.pdf]

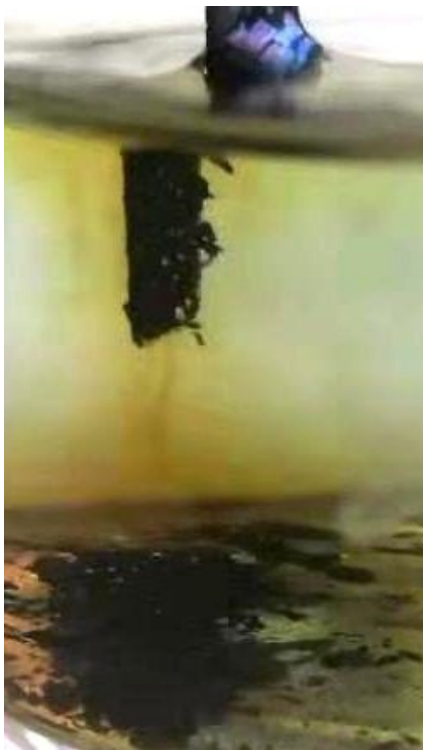

Supplement: d0cp01426e30.pdf [file d0cp01426e30.pdf]

# Equivalent circuit

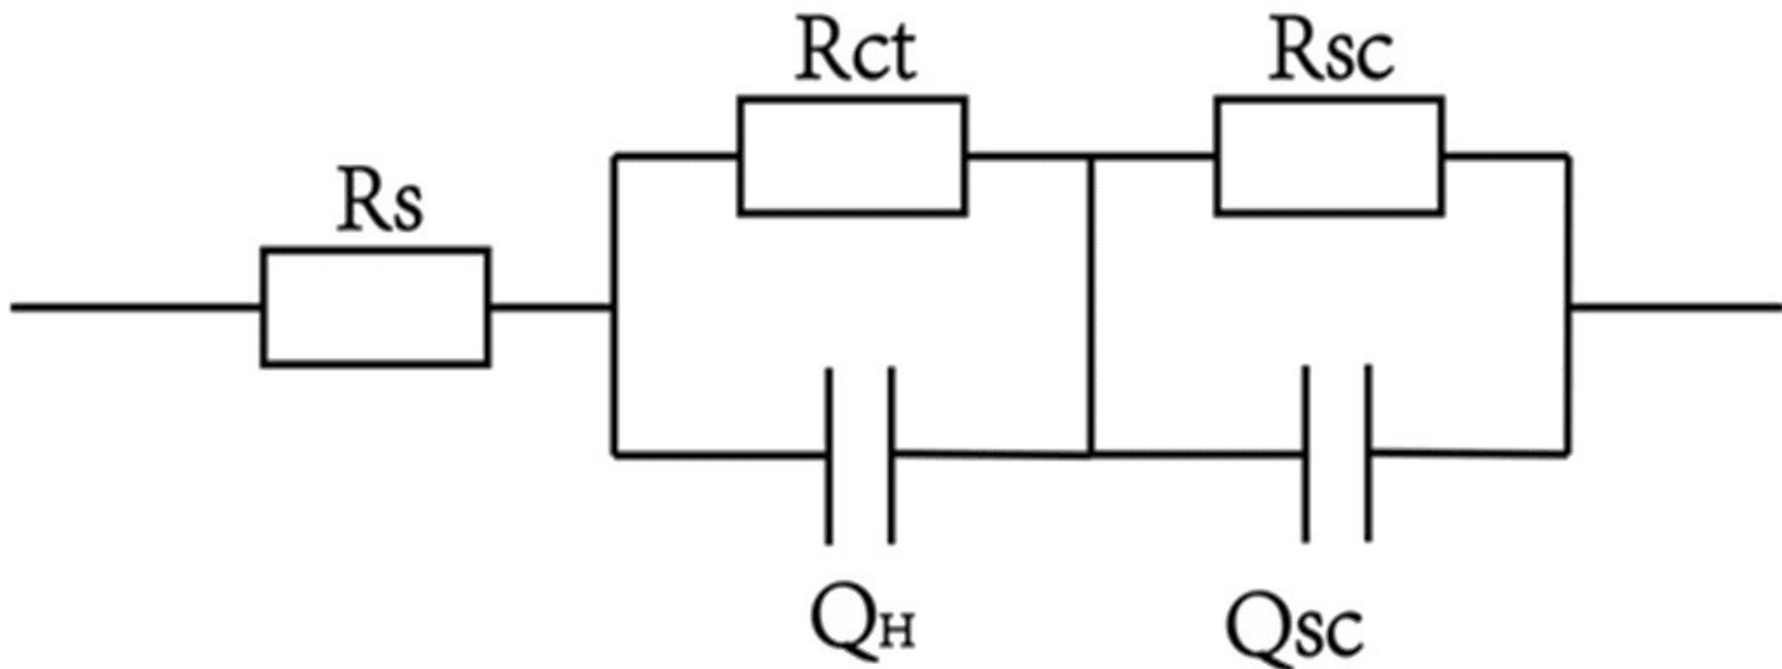

Supplement: d0cp01426e4.pdf [file d0cp01426e4.pdf]

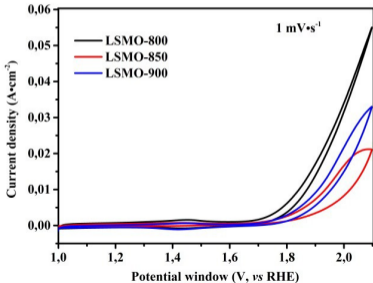

Supplement: d0cp01426e5.pdf [file d0cp01426e5.pdf]

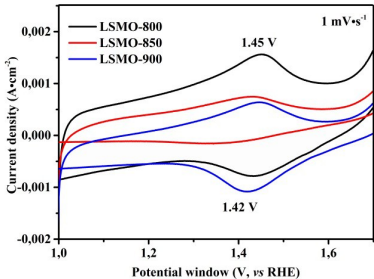

Supplement: d0cp01426e6.pdf [file d0cp01426e6.pdf]

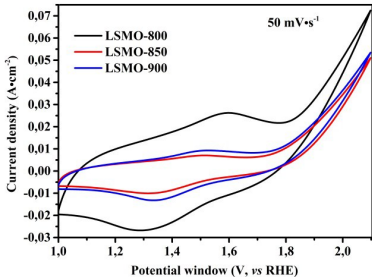

Supplement: d0cp01426e7.pdf [file d0cp01426e7.pdf]

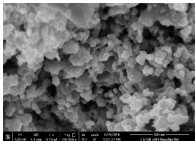

Supplement: d0cp01426e8.pdf [file d0cp01426e8.pdf]

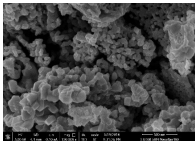

Supplement: d0cp01426e9.pdf [file d0cp01426e9.pdf]
